# Supplementary material
Source: PubMed Central journal article supplement (PMC8710551)
Supplement: mmc1.pdf [file mmc1.pdf]

iScience, Volume 24

## **Supplemental information**

**Immune system cells from COVID-19 patients display  
compromised mitochondrial-nuclear expression  
co-regulation and rewiring toward glycolysis**

**Hadar Medini, Amit Zirman, and Dan Mishmar**

## Supplemental information

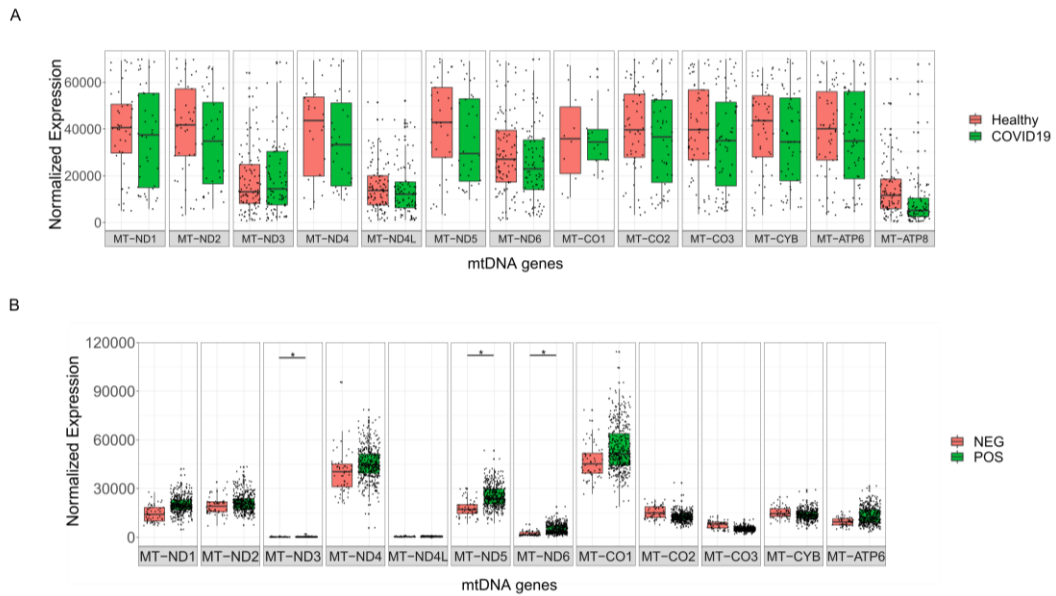

**Figure S1. Expression of mtDNA-encoded genes did not significantly differ between healthy and COVID-19 patients in Nasopharyngeal (upper airway) samples, related to Figure 2, Table S1.** Box plots representing mtDNA-encoded gene expression of (A) healthy (N=103), COVID-19 patients (N=94) from Dataset I, (B) negative controls (NEG) (N=54), SARS-CoV-2 positive individuals (POS) (N=430) from Dataset IV. X-axes – gene names; Y-axes – normalized read counts, which reflects expression levels.

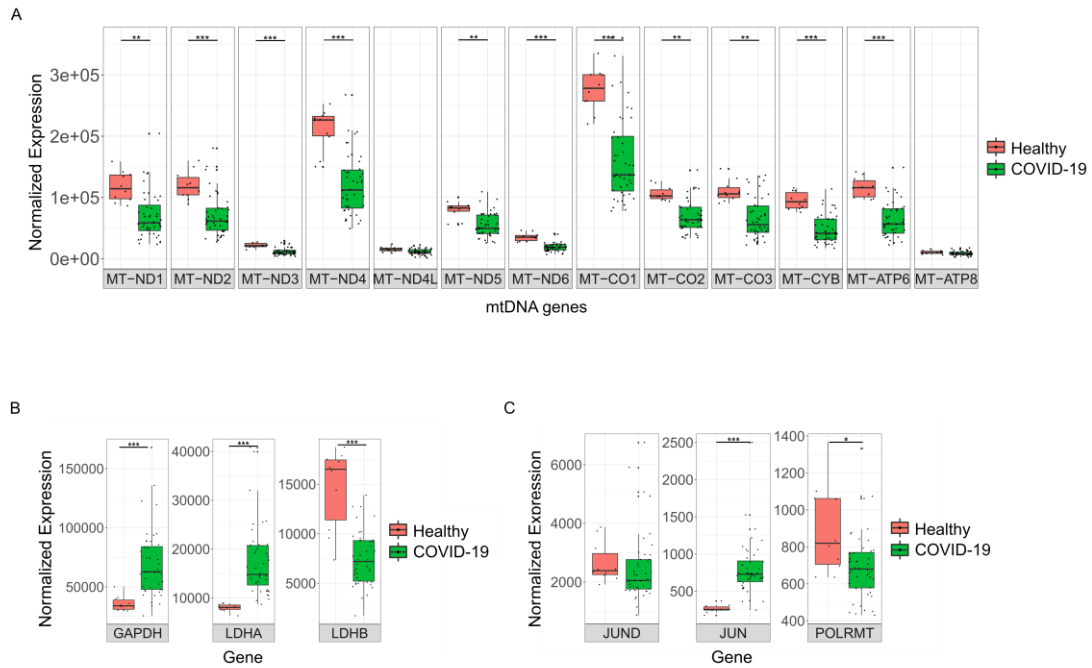

**Figure S2. Decreased mtDNA gene expression levels as a feature of COVID-19 in whole blood (Dataset V), related to Figures 2,3, Tables S1-S3.** (A) Box plot of Bulk RNA-seq analysis in whole blood display lower mtDNA gene expression in COVID-19 patients as compared to healthy controls. (B) Box plots of GAPDH, LDHA and LDHB and (C) JUND, JUN, POLRMT expression levels. Significance: \* -  $p < 0.05$ , \*\* -  $p < 0.005$ , \*\*\* -  $p < 0.0005$ . X, Y axes – as in Fig. 2.
